# Supplementary material
Source: PubMed Central journal article supplement (PMC5033703)

## Supplemental Data

### Table 1 Sequences of PCR primers and siRNAs

#### Supplemental figure legend

**Supplemental Figure I.** *MYOSLID* and its neighboring genes. **A**, Genome browser track of *MYOSLID* gene locus and its neighboring protein coding genes. *MYOSLID* is located within a lncRNA-rich genomic region. Several distinct lncRNAs are adjacent to *MYOSLID* gene locus and transcribed in an opposite direction. The closest protein coding genes, *KLF7* and *CREB1*, are 70 kb and 200 kb away from its 5' end and 3' end, respectively. **B**, HCASMCs were transduced with adenovirus carrying MYOCD (Ad-MYOCD) or empty control adenovirus (Ad-Control) for 3 days before qRT-PCR analysis of mRNA levels of AC007879.5 and LOC101927865. **C**, HCASMCs were serum starved for 24 hrs, cells were then treated with TGF $\beta$ 1 (4 ng/ml) or vehicle control for another 24 hrs before RNA extraction for qRT-PCR analysis of mRNA levels of AC007879.5 and LOC101927865. **D**, qRT-PCR analysis of mRNA levels of *KLF7* from RNA samples similar to **B**. **E** and **F**, qRT-PCR evaluation of *MYOSLID* knockdown effect on mRNA levels of the indicated genes in HCASMCs 3 days after Dicer substrate siRNA to *MYOSLID* (D-si*MYOSLID*) or same amount of the D-siRNA negative control (D-siControl) transfection. Values are the mean  $\pm$  SD and all data are representative of 3 separate experiments.

**Supplemental Figure II.** Characterization of *MYOSLID* transcripts. **A**, Growing HCASMCs were transduced with same amount of Ad-MYOCD or Ad-Vector control for 3 days before RNA isolation for conventional RT-PCR analysis of *MYOSLID\_V1* and *MYOSLID\_V2*. Multiple primer pairs were used to verify the results. Representative data from > 2 experiments are shown. **B**, Sequence information of full length transcripts of *MYOSLID\_V1* and *MYOSLID\_V2*.

**Supplemental Figure III.** Validation of the coding potential of *MYOSLID*. **A**, No predicted proteins/peptides were revealed within the *MYOSLID* gene locus by PhyloCSF. **B**, Quick coupled in vitro transcription/translation combined with Transcend Chemiluminescent Translation Detection was used to experimentally validate the coding potential of *MYOSLID*. *MYOSLID\_V1*, *MYOSLID\_V2*, vector control pcDNA, and the positive control luciferase plasmid were processed per manufacturer's instruction. 8  $\mu$ l of translation product was resolved in 15% SDS-PAGE gel and detected by Transcend Chemiluminescent Translation Detection. Note: An expected band (63 KD) was seen in the positive control sample processed from luciferase

plasmid. Compared with the control pcDNA, no specific proteins/peptides were revealed in the samples processed from *MYOSLID\_V1* and *MYOSLID\_V2* plasmids.

**Supplemental Figure IV.** mRNA levels of MYOCD and SRF in AVF human samples. qRT-PCR analysis of mRNA levels of *MYOCD* and *SRF* in normal vein and failed AVF samples (diseased vein), as described in Figure 4D (n=6).

**Supplemental Figure V.** Effects of *MYOSLID* on VSMC proliferation and migration. **A**, Growing HCASMCs were transduced with lenti-*MYOSLID\_V1* or equal amount of lenti-vector control for 48 hrs. Scratch wound was created and cell migration was assessed by time-lapsed microscopy. The representative image at 4 hrs after the creation of scratch wound (upper panel) and the quantitative analysis of the percentage of the area covered by migrating cells to the original wound area (bottom panel) are shown. **B**, Growing HCASMCs were transfected with the indicated siRNAs for 48 hrs and cell migration was assessed, as described in **A**. The representative image at 6 hrs after the creation of the scratch wound (upper panel) and the quantitative analysis (bottom panel) are shown.

**Supplemental Figure VI.** Forced expression of *MYOSLID* on F-actin formation. Growing HCASMCs were transfected with siSRF for two days before the lentiviral transduction of *MYOSLID\_V1*. 48 hrs after viral transduction, cells were then fixed with 4% formaldehyde solution before phalloidin staining for F-actin formation. Representative images are shown for each indicated condition. Note: lenti-*MYOSLID\_V1* rescues F-actin formation in HCASMCs when SRF is depleted.

**Supplemental Figure VII.** Effect of *MYOSLID* knockdown on SRF and MKL1 protein levels and mRNA levels of its neighboring lncRNAs. **A**, Growing HCASMCs were transfected with two different D-siRNAs to *MYOSLID*. Cells were starved overnight before the 24 hrs treatment of  $\pm$ TGF $\beta$ 1 (4 ng/ml). Protein was then extracted for Western blotting analysis of SRF and MKL1. Represented data are from 3 separate experiments. **B**, Growing HCASMCs were transfected with two different D-siRNAs to *MYOSLID* for 3 days. qRT-PCR was done to examine the mRNA levels of the indicated genes. Represented data are from 2 independent experiments.

A

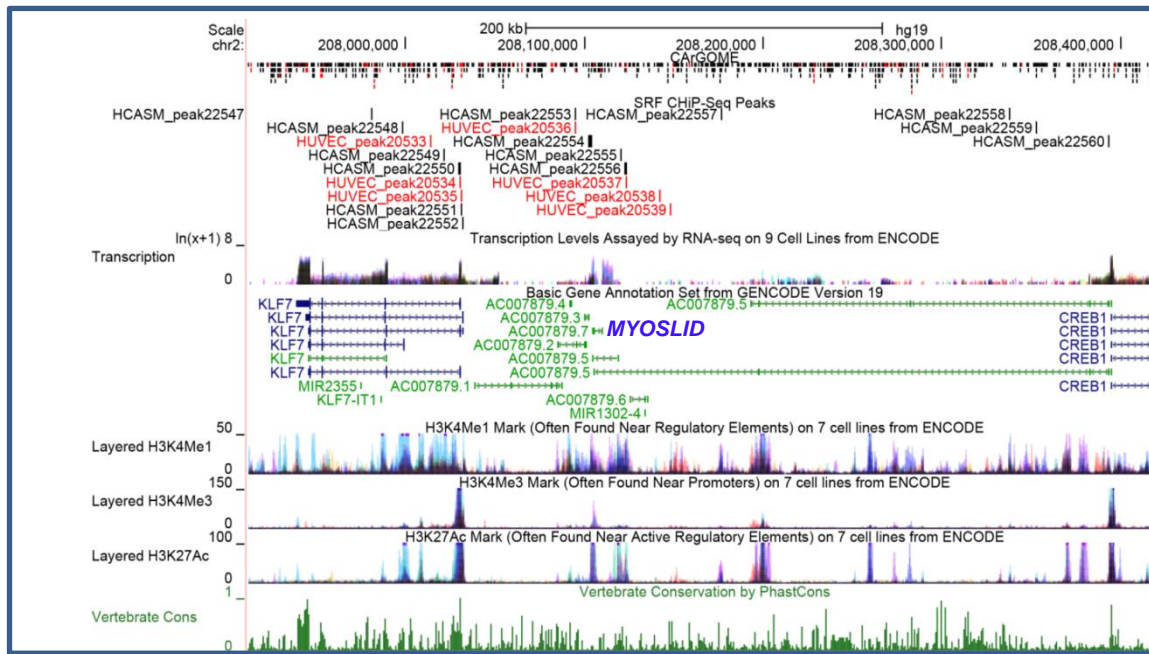

B

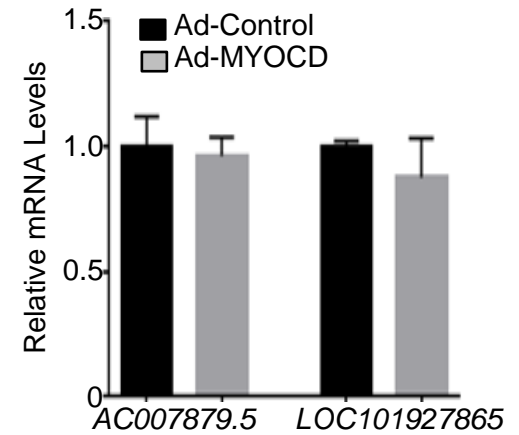

C

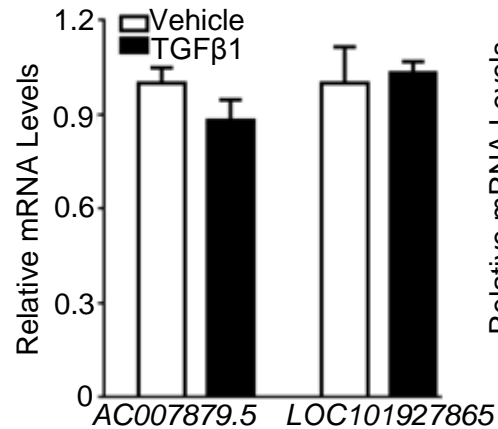

D

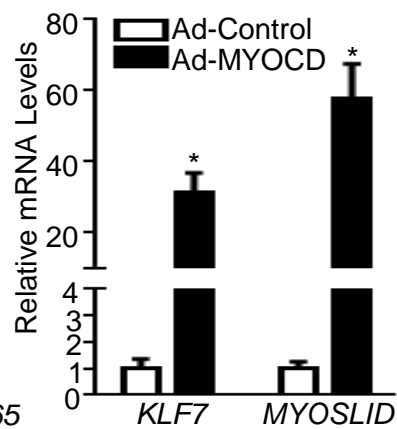

E

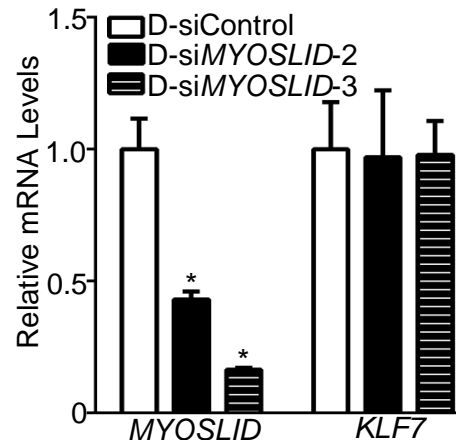

F

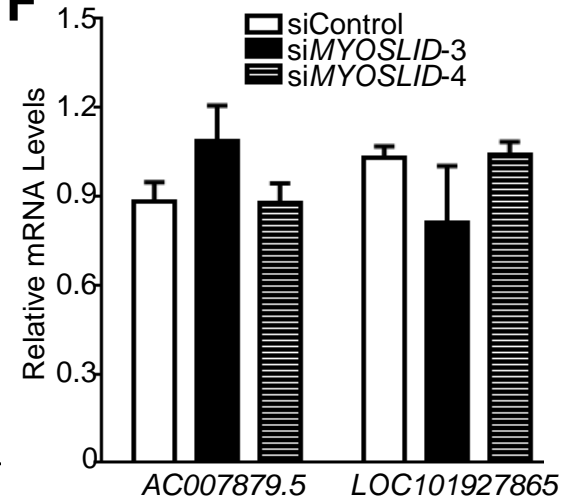

**A**

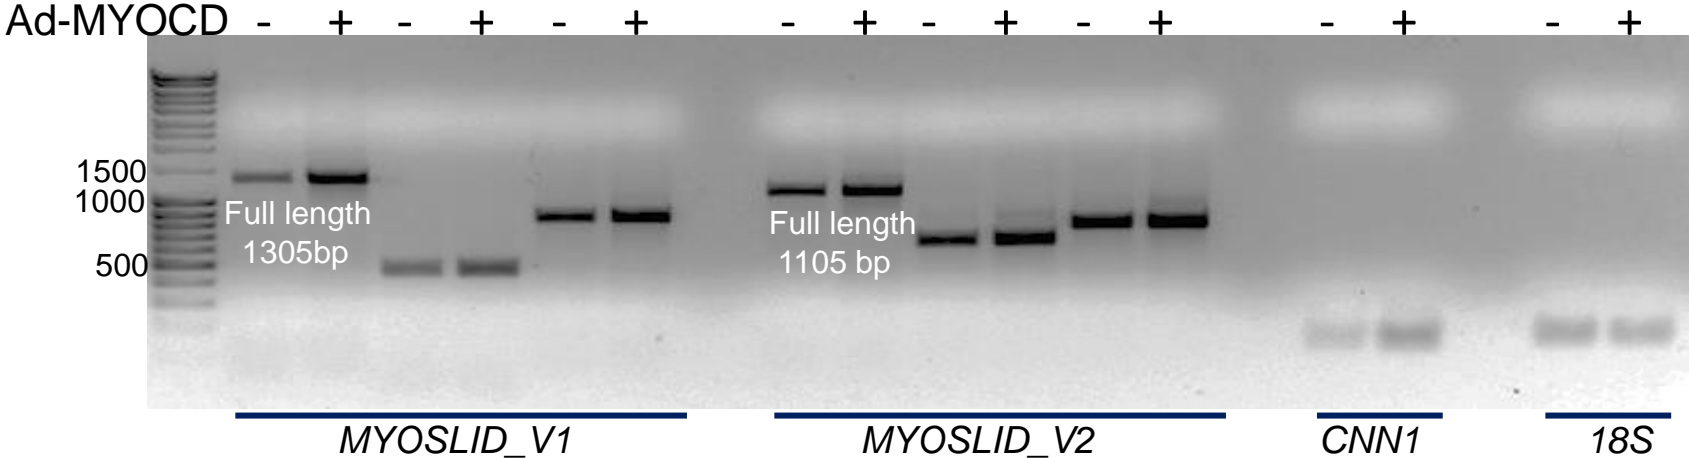

**B**

*MYOSLID\_V1* sequence:

```
GGTTTTCCAGGGCATGGAAGGACAGGGCTCCAGTGGAGATATCATGTAGCTATAGGGCCTAGAAGTATTTTT
TCAGTAGATGAAATTTAGAAATAATTTGAATATTTTATGCTGGGGAGGTAGCTTGTGGAGTGAAATGGTCGGGTA
AAGGAAACACTGAGTTCAAGTGCTTCTTTATAAAGGACACTTAACTGATCTAAATATTTGTCAAGCTGAATCGCTAC
ATCCACTCTCACCTGCCTGAAATCAATATGCTCAAGTCAAACGCATTTGCCTGCATCTGAATGTGGAGAATGAACTT
CTTAAAGCTGAACTGGCAGCTGGAAGGGGAGAGAGAAGAGCTGGACAGGGAGCCAGGACACCCGGAGTTCTTTTC
CACTGTGGTGGGATCTGGAAGAAGCTGTTGAATCTCTGTAGAGTTAGCTTTTAAATGCTGTGAGTCTTTGAAAAGC
TGTGCGAATAACTGCTAAACACCCAGGACAGCTTATGCATTTTTGAAAAAGGTTCTGGTGTCTGGTTCCAGCAGA
ATAGACACAGAGATGCATGGCCTAACTCCCACTCCCTCTTCAGGACTGAGCCACGCAGCCCCCATCTGCCAGAAG
TGTTAGCTGTTGACGGCTCACAGCTGAGTCCCTCTCCAGGCATTGCTGAAAAGAGCCACCTTGCTCTAGGATGTGC
CCCCACCTGGGGGCAGCATACTCCAAGTGATTAGTCCATAGTGTGGTACAAAGGTTGTACCCATCTTGCTCTGA
ATTCAGGATCTCTTGAAAAACACCCAGCTCTGCAGCTCCTGGTGGGGTGTCTGAGGCCTCTGCTGCAGCTGCATC
GCAGTTTACTTTCCCTCTGCCTAGTCTGCTGCCTTCACTCCCCAACAGATCACCCGCTCTGAACATGCCATCTACT
GTGGAATCTTCAATCTTTAATTAATTTTTCTGTTACAGGAAGATTAAGTCTAAAAGGATCTCCCTAGTTGAT
CCAGAACTAAATGACATTGTTTTCAGTACTTCCAGTAACTTGCTTACACTTCTACTTCTAAAGCATTGAATGTATCAT
CTTATGTGCTTGTCAACCCAGCTTGTGTCATAGGAGAAAATATACGGAGATCAGGTACAACCTTCAAGTCAACAGC
TTATGAGCTATTGGATCAGTCTCTTATTAATCTCTCAGAGCCTCAATTTCTTGTTTAAAAATGGGGCAATACCTAC
TTAAGGAATTTCTTGAGGATCAAAAAGAACCCCTAGTAACAAAGCCTTGAACCATGTCTGACTTATAGTATATATCT
AACTGCA
```

*MYOSLID\_V2* sequence:

```
GGTTTTCCAGGGCATGGAAGGACAGGGCTCCAGTGGAGATATCATGTAGCTATAGGGCCTAGAAGTATTTTT
TCAGTAGATGAAATTTAGAAATAATTTGAATATTTTATGCTGGGGAGGTAGCTTGTGGAGTGAAATGGTCGGGTA
AAGGAAACACTGAGTTCAAGTGCTTCTTTATAAAGGACACTTAACTGATCTAAATATTTGTCAAGCTGAATCGCTAC
ATCCACTCTCACCTGCCTGAAATCAATATGCTCAAGTCAAACGCATTTGCCTGCATCTGAATGTGGAGAATGAACTT
CTTAAAGCTGAACTGGCAGCTGGAAGGGGAGAGAGAAGAGCTGGACAGGGAGCCAGGACACCCGGAGTTCTTTTC
CACTGTGGTGGGATCTGGAAGAAGCTGTTGAATCTCTGTAGAGTTAGCTTTTAAATGCTGTGAGTCTTTGAAAAGC
TGTGCGAATAACTGCTAAACACCCAGGACAGCTTATGCATTTTTGAAAAAGGTTCTGGTGTCTGGTTCCAGCAGA
ATAGACACAGAGATGCATGGCCTAACTCCCACTCCCTCTTCAGGACTGAGCCACGCAGCCCCCATCTGCCAGAAG
TGTTAGCTGTTGACGGCTCACAGCTGAGTCCCTCTCCAGGCATTGCTGAAAAGAGCCACCTTGCTCTAGGATGTGC
CCCCACCTGGGGGCAGCATACTCCAAGTGATTAGTCCATAGTGTGGTACAAAGGTTGTACCCATCTTGCTCTGA
ATTCAGGATCTCTTGAAAAACACCCAGCTCTGCAGCTCCTGGTGGGGTGTCTGAGGCCTCTGCTGCAGCTGCATC
GCAGTTTACTTTCCCTCTGCCTAGTCTGCTGCCTTCACTCCCCAACAGGATTGTTCCCAAGAACTCCCTGCC
CCAGTCACTGTAAGCAAATCTCCACTGCAGTCTGTGGCCTGGGAAACCTGCTCTAGGATCCCAAAGTGAACACAG
CTTCCATTGAAATGTGCTTTGGGTGTTAATCTGTCTGCCATCTTTACATCTAATCAAGAGGTAGAGCTTCCCTGT
GTGTTCTGCTGGGTACATAAAGGATCTTTTCCATTGTC
```

# Supplemental Figure III

**A**

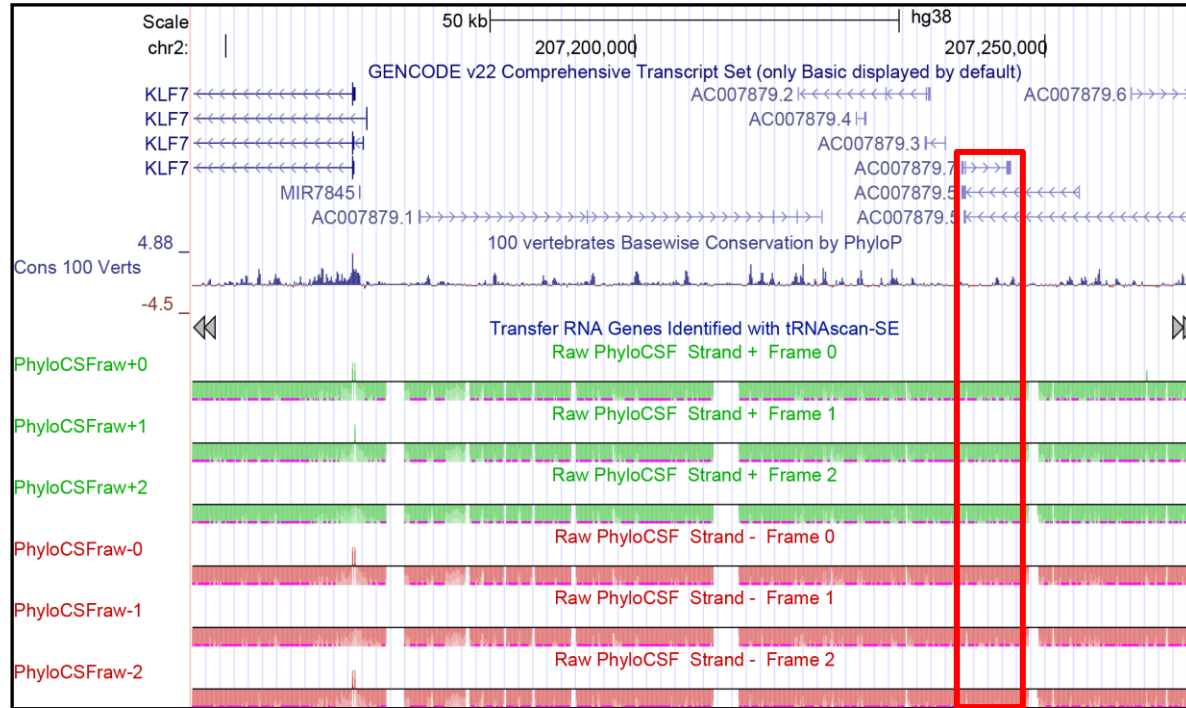

**B**

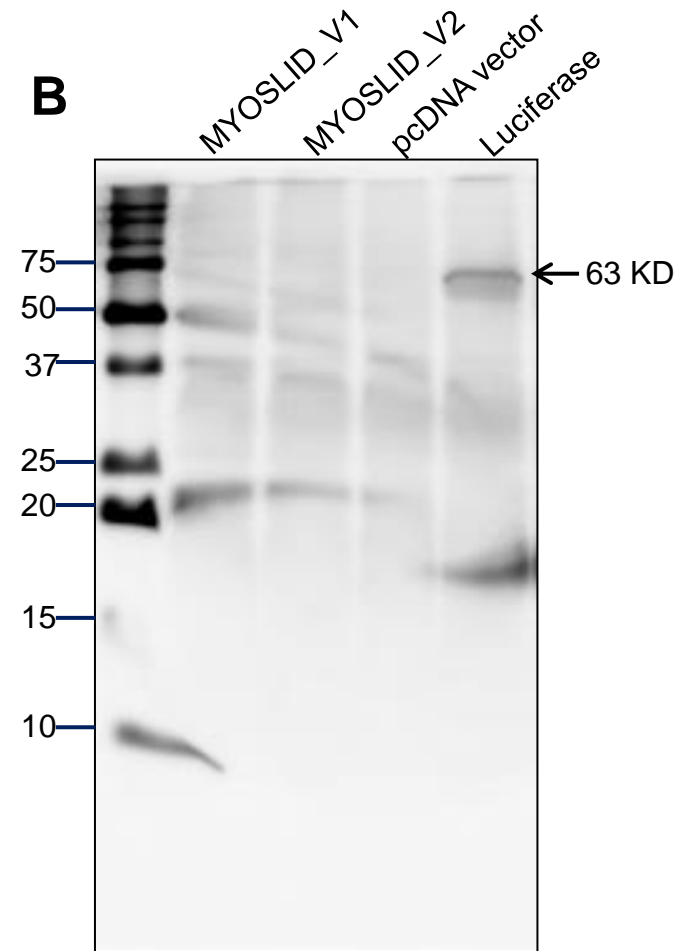

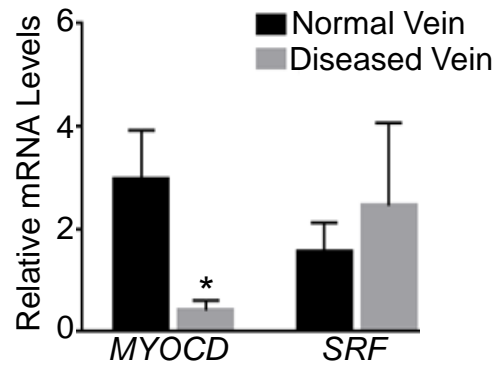

# Supplemental Figure V

**A**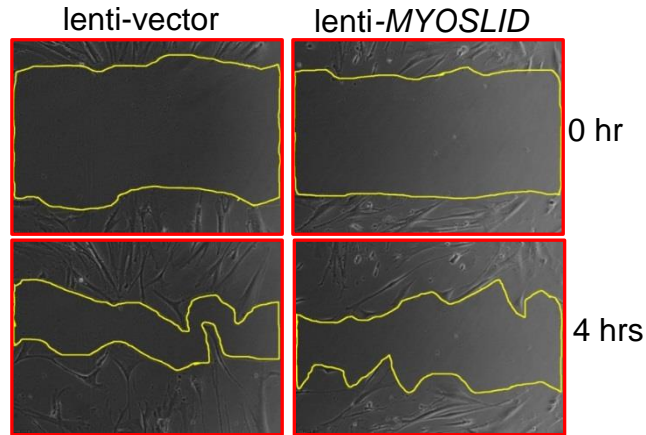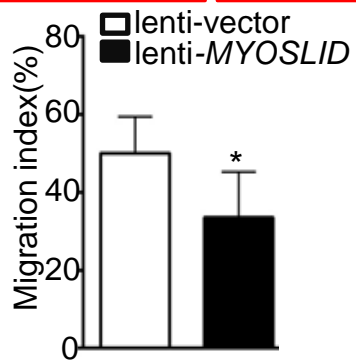**B**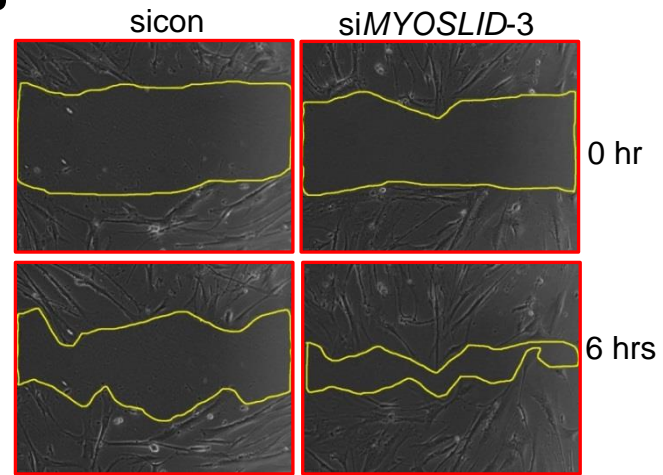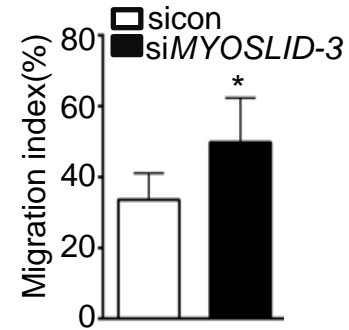

# Supplemental Figure VI

siCtrl+lenti-vector

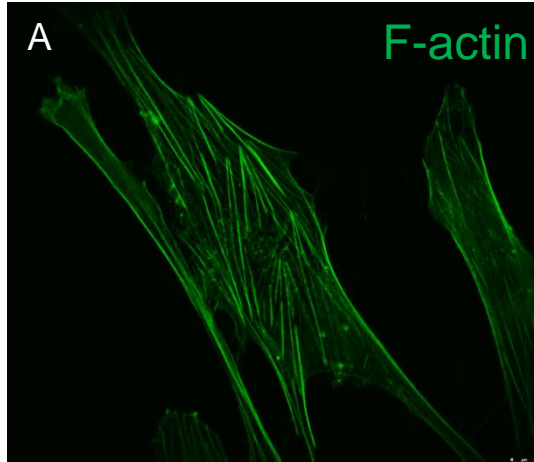

siCtrl+lenti-*MYOSLID*

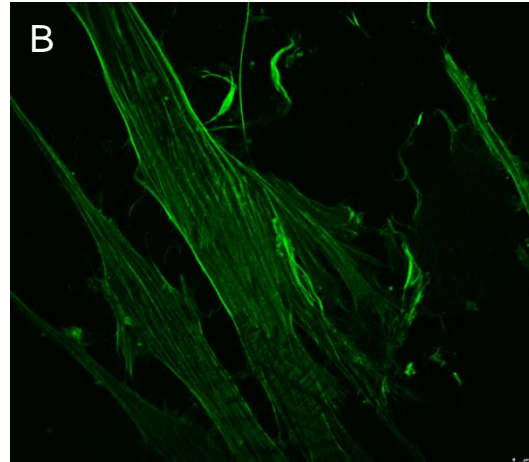

siSRF+lenti-vector

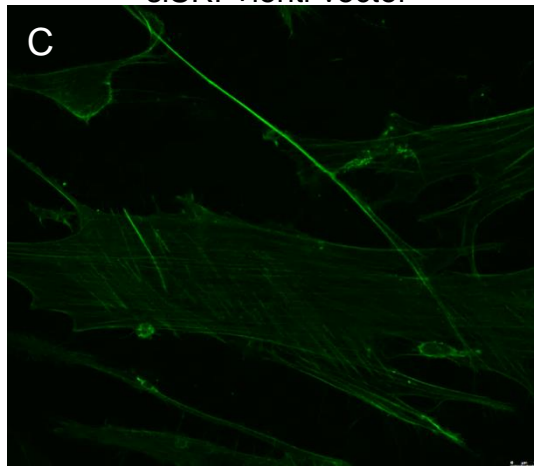

siSRF+lenti-*MYOSLID*

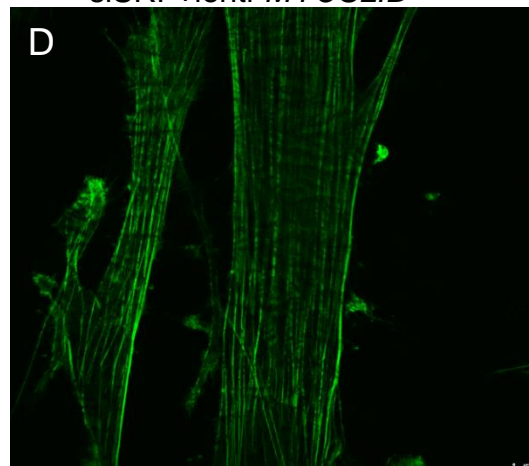



**A**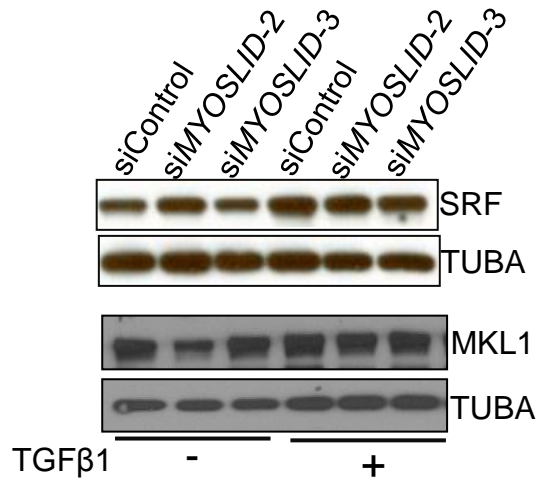**B**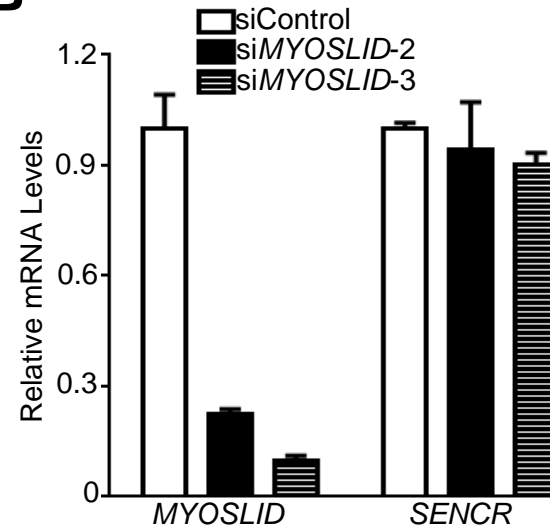

Supplemental Table 1: Sequences of PCR primers and siRNAs

| Name of Sequence                                  | Strand             | Sequence                                                                             | Application(s) |
|---------------------------------------------------|--------------------|--------------------------------------------------------------------------------------|----------------|
| <i>MYOCD-lncRNA1</i>                              | Forward<br>Reverse | CGTTGAGCGAGAGGTTGTGG<br>GAAGAGGCCGAAGCGAAGAG                                         | qRT-PCR        |
| <i>MYOCD-lncRNA2</i>                              | Forward<br>Reverse | CGCCATGTGCTACGATCTTG<br>CGCCACCTTACCGCTAG                                            | qRT-PCR        |
| <i>MYOCD-lncRNA3</i>                              | Forward<br>Reverse | TCGGAGCAGCATCTGAGAGG<br>TTCCAGGCTAGAGCGGAGTAG                                        | qRT-PCR        |
| <i>MYOCD-lncRNA4</i>                              | Forward<br>Reverse | GTGGATTGGAAGTGATGTTAAGG<br>GAAGGAAGGAAGGAAGGAAGG                                     | qRT-PCR        |
| <i>MYOCD-lncRNA5</i>                              | Forward<br>Reverse | ACCAAGAATGAAAGGCAACCTATG<br>ATGATGGCTCTGGGTTTCCTTC                                   | qRT-PCR        |
| <i>MYOSLID</i>                                    | Forward<br>Reverse | ACAGGGAGCCAGGACACC<br>GGAACCAGCACCAGGAACC                                            | qRT-PCR        |
| <i>MYOCD-lncRNA7</i>                              | Forward<br>Reverse | CTGAATGCCTGGGTCCTTA<br>GACATTCTCCCCTGCTCATAC                                         | qRT-PCR        |
| <i>MYOCD-lncRNA8</i>                              | Forward<br>Reverse | ACATTGAAAACCACATCCTGC<br>GAAAATCGAGGACCAGGGAG                                        | qRT-PCR        |
| <i>MYOCD-lncRNA9</i>                              | Forward<br>Reverse | ACTCTGACCTCCAGAACTAGG<br>CTAGAAAACCTTCAGCTCCC                                        | qRT-PCR        |
| <i>MYOCD-lncRNA10</i>                             | Forward<br>Reverse | TGCACTGGAAATGGCTGG<br>ACCCTGTTTGTGAGGCTTC                                            | qRT-PCR        |
| <i>MYOCD-lncRNA11</i>                             | Forward<br>Reverse | TTGATGGCATGGACCTGG<br>TGACGCATCTTAAATAGCCTGG                                         | qRT-PCR        |
| <i>MYOCD-lncRNA12</i>                             | Forward<br>Reverse | AGGTGGACACAATTGATGGG<br>CTTCTGGTGAGGGCTGC                                            | qRT-PCR        |
| <i>MYOCD-lncRNA13</i>                             | Forward<br>Reverse | CCTAGCACCCCTTTAAGTCCG<br>TGTCAGCCTTACACATTCCG                                        | qRT-PCR        |
| <i>LMOD1</i>                                      | Forward<br>Reverse | GCGGCAGAGAAACCAGAC<br>CCACTTGCTTGCTTTTCATCC                                          | qRT-PCR        |
| <i>18S</i>                                        | Forward<br>Reverse | ATGGGCGGCGGAAAATAGC<br>TCTTGGTGAGGTCAATGTCTGC                                        | qRT-PCR        |
| <i>AC007879.5</i>                                 | Forward<br>Reverse | GGAGATTTGAGTCTTAGGAATTTGG<br>AACACCCAGGACAGCTTATG                                    | qRT-PCR        |
| <i>LOC101927865</i>                               | Forward<br>Reverse | ATTGGTATGGAGACGTGGATG<br>ATGCTGGTGTGGTCCTTAG                                         | qRT-PCR        |
| <i>KLF7</i>                                       | Forward<br>Reverse | ACATCCCAACTCCAGAAAACG<br>AGGTAGCGTTCCAATTC AAGG                                      | qRT-PCR        |
| <i>MYOSLID_ V1 full length</i>                    | Forward<br>Reverse | GGTTTTCCCAGGGCATGGAAAG<br>CTATAAGTCAGACATGGTTC                                       | RT-PCR Clone   |
| <i>MYOSLID_ V2 full length</i>                    | Forward<br>Reverse | GGTTTTCCCAGGGCATGGAAAG<br>CCTTTATGTACCCAGCAGGAACA                                    | RT-PCR Clone   |
| <i>SENCR</i>                                      | Forward<br>Reverse | TTACCTTGTCCACGCTCTCC<br>CCGTCTCTCCGATTCTCC                                           | qRT-PCR        |
| <i>MYOCD</i>                                      | Forward<br>Reverse | TGCTGCTGTAAAGTCCAAATCC<br>GCGTAGGCTGAGTCCATAGG                                       | qRT-PCR        |
| <i>ACTA2</i>                                      | Forward<br>Reverse | AGCCAAGCACTGTCAGGAATC<br>GAGCCCAGAGCCATTGTCAC                                        | qRT-PCR        |
| <i>SRF</i>                                        | Forward<br>Reverse | CTACACGACCTTCAGCAAGAG<br>TGGAGAGTCTGGCGAGTTG                                         | qRT-PCR        |
| <i>MYOSLID -2kb promoter</i>                      | Forward<br>Reverse | CTCAAGGTGGCTCAAGATAA<br>CATGATATCTCCACTGGGA                                          | PCR clone      |
| <i>MYOSLID -890 bp promoter</i>                   | Forward<br>Reverse | CTGGTAAAGCTTGAGGATCA<br>CATGATATCTCCACTGGGA                                          | PCR clone      |
| <i>MYOSLID -157 bp promoter</i>                   | Forward<br>Reverse | TTGGAGTGCAAGAGAGCCCCTAA<br>CATGATATCTCCACTGGGA                                       | PCR clone      |
| <i>MYOSLID ChIP CARG1</i>                         | Forward<br>Reverse | ATCTGACCTTATCTTGGCACC<br>AGTCAGAATACCAGCCATGTG                                       | qPCR           |
| <i>MYOSLID ChIP CARG2</i>                         | Forward<br>Reverse | TACAATGGGACCTTGCTCAC<br>AGAAAAGAGCCCTTCTCTGTAATC                                     | qPCR           |
| <i>MYOSLID ChIP CARG3</i>                         | Forward<br>Reverse | AGGAATGTGTCTGTGGGAAG<br>AGGTCTCTGTCTCTGCCTG                                          | qPCR           |
| <i>MYOSLID ChIP Negative Control</i>              | Forward<br>Reverse | TAATCTCTCAGAGCCTCAATTTCC<br>AGGCTTTGTTACTAGGGTTTCTT                                  | qPCR           |
| <i>CNN1 ChIP Intronic CARG1</i>                   | Forward<br>Reverse | TCGGGCGAGAGACAGAT<br>AAGCAAACCGGCCCTTAT                                              | qPCR           |
| <i>MYH11</i>                                      | Forward<br>Reverse | CGCCAAGCCAGAGACGAGAG<br>GAGGAAGGTGTAGTTGTTGAAGCC                                     | qRT-PCR        |
| <i>CNN1</i>                                       | Forward<br>Reverse | ATGTCCTCTGCTCACTTCAAC<br>GCTGGTGGTCATACTTCTGG                                        | qRT-PCR        |
| <i>TAGLN</i>                                      | Forward<br>Reverse | CATCCTGTCTGTCCGAACC<br>CACTATGATCCACTCCACCAG                                         | qRT-PCR        |
| <i>IL6</i>                                        | Forward<br>Reverse | GTGTTGCCTGCTGCCTTC<br>AGTGCCTCTTTGCTGCTTTC                                           | qRT-PCR        |
| <i>MKL1</i>                                       | Forward<br>Reverse | CAGCCTGAAGGAAGCCATC<br>GCCCATCGGAAGTTGAGAC                                           | qRT-PCR        |
| <i>MYOSLID - 2 kb promoter SBE1/2 mutagenesis</i> | Forward<br>Reverse | ATATGCACCTAcAtAAGATGTCTCTGAtAcAtCAGGAAGG<br>CCTTCTGAtGtTaTCAGAGACATCTTaTgTaGGTGCATAT | mutagenesis    |
|                                                   | Forward            | TCAAGCTGGTGAAtAcAtCCTGAAAAGCTGA                                                      |                |

|                                                |                    |                                                                                                            |                |
|------------------------------------------------|--------------------|------------------------------------------------------------------------------------------------------------|----------------|
| <i>MYOSLID</i> -2 kb promoter SBE3 mutagenesis | Reverse            | TCAGCTTTTCAGGaTgTaTTCACCAGCTTGA                                                                            | mutagenesis    |
| <i>SMAD4</i>                                   | Forward<br>Reverse | ACCATCATAACAGCACTAC<br>GGAACACCAATACTCAGG                                                                  | qRT-PCR        |
| <i>GAPD</i>                                    | Forward<br>Reverse | CGCTCTCTGCTCCTCCTGTTC<br>TTGACTCCGACCTTCACCTTCC                                                            | qPCR           |
| <i>MYOSLID_V1</i>                              | Forward<br>Reverse | GCTGCATCGCAGTTTACTTTC<br>AGGCTTTGTTACTAGGGTTTCTT                                                           | RT-PCR         |
| <i>MYOSLID_V2</i>                              | Forward<br>Reverse | ACAGGGAGCCAGGACACC<br>GGGAAGCTCTACCTCTTGATTAG                                                              | RT-PCR         |
| <i>GUSB</i>                                    | Forward<br>Reverse | GCTATGGGATTGTGGTCATCG<br>AGGATTTGGTGTGAGCGATC                                                              | qRT-PCR        |
| <i>DsiRNA-MYOSLID-2</i>                        | AntiSense<br>Sense | rUrUrCrArGrCrUrUrUrArArGrArArGrUrUrCrArUrUrCrUrCrArC<br>rGrGrArGrArArUrGrArArCrUrUrCrUrUrArArArGrCrUrGAA   | gene knockdown |
| <i>DsiRNA-MYOSLID-3</i>                        | AntiSense<br>Sense | rGrGrCrArCrArUrCrCrUrArGrArGrCrArArGrUrGrGrCrUrCrUrU<br>rGrArGrCrCrArCrCrUrUrGrCrUrCrUrArGrGrArUrGrUrGCC   | gene knockdown |
| <i>DsiRNA-MYOSLID-4</i>                        | AntiSense<br>Sense | rCrUrArCrArGrArGrArUrUrCrArArCrArGrCrUrUrCrUrUrCrCrArG<br>rGrGrArArGrArArGrCrUrGrUrUrGrArArUrCrUrCrUrGrUAG | gene knockdown |

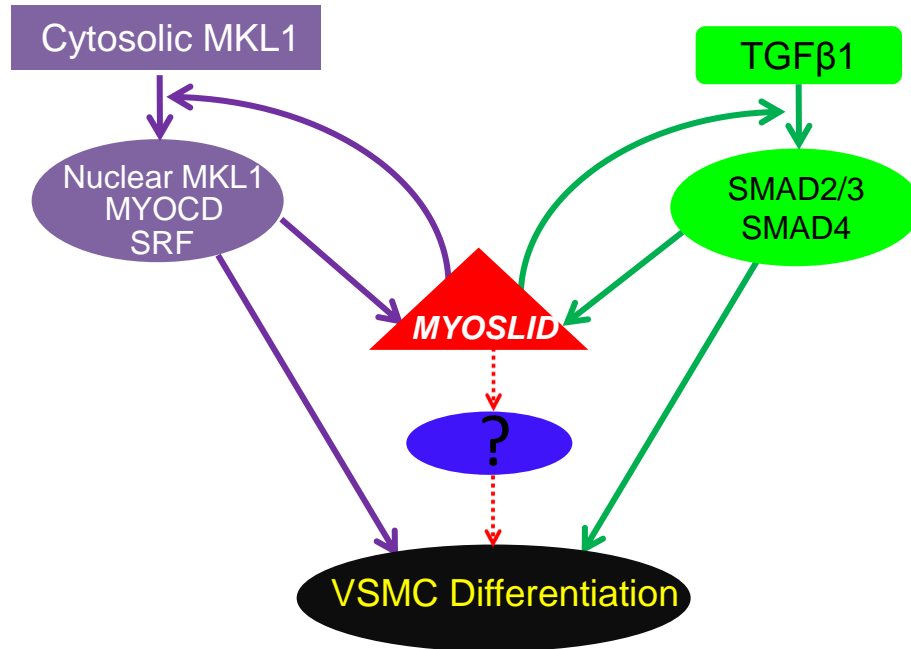

Supplement: NIHMS801301-supplement-SUPPLEMENTAL_MATERIAL.pdf [file NIHMS801301-supplement-SUPPLEMENTAL_MATERIAL.pdf]
