# Supplementary material
Source: PubMed Central journal article supplement (PMC5033703)

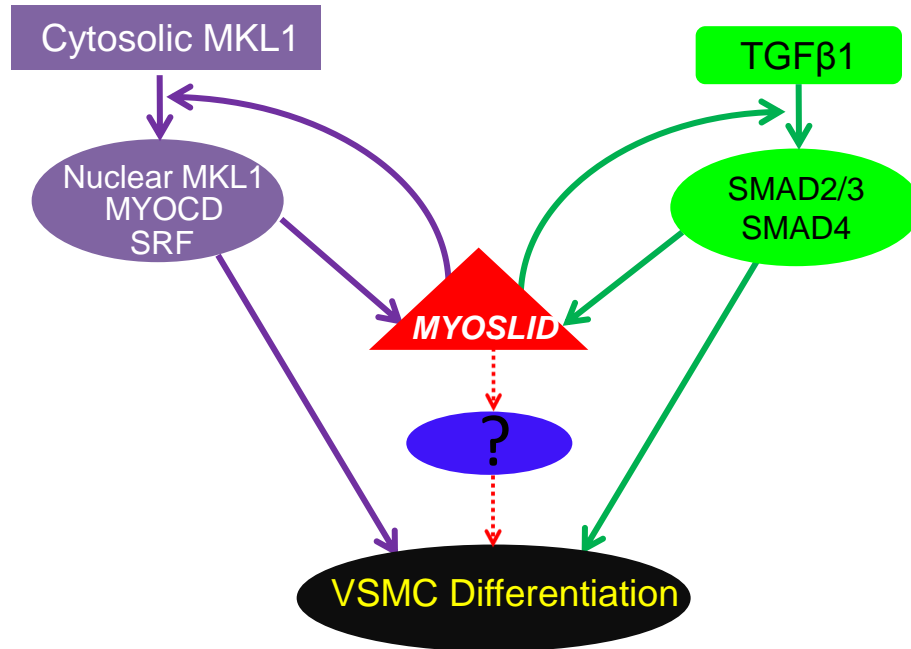

Supplement: NIHMS801301-supplement-Graphic_Abstract.pdf [file NIHMS801301-supplement-Graphic_Abstract.pdf]
